# Supplementary material for: Rho GTPases: RAC1 polymorphisms affected platinum-based chemotherapy toxicity in lung cancer patients
Source: Springer Nature journal article supplement (doi:10.1007/s00280-016-3072-0), 2016-06-14
Supplement: MOESM1 [file 10253392]

Supplementary imformation

Relations of the polymorphisms to the severe toxicity of platinum-based chemotherapy for lung cancer

| Gene | Polymorphisms | Severe toxicity  (11/12/22) | Non-severe toxicity  (11/12/22) | Additive |  | Dominant |  | Recessive |  |
| --- | --- | --- | --- | --- | --- | --- | --- | --- | --- |
|  |  |  |  | OR(95%CI) | P value | OR(95%CI) | P value | OR(95%CI) | P value |
| *HSPA4* | rs3088225 | 15/63/53 | 17/85/76 | 1.06(0.75-1.52) | 0.730 | 1.02(0.64-1.63) | 0.943 | 1.27(0.60-2.68) | 0.536 |
|  | rs4616886 | 80/49/5 | 122/49/9 | 1.33(0.89-1.97) | 0.166 | 1.54(0.96-2.49) | 0.076 | 0.85(0.27-2.64) | 0.779 |
| *HSPB1* | rs2009836 | 85/38/8 | 108/56/14 | 0.86(0.60-1.26) | 0.443 | 0.85(0.53-1.38) | 0.515 | 0.74(0.30-1.86) | 0.526 |
|  | rs2070804 | 61/64/7 | 105/58/17 | 1.15(0.80-1.65) | 0.464 | 1.51(0.95-2.40) | 0.080 | 0.49(0.19-1.25) | 0.134 |
|  | rs2868370 | 97/31/3 | 125/47/6 | 0.85(0.54-1.32) | 0.461 | 0.85(0.51-1.42) | 0.531 | 0.64(0.15-2.69) | 0.541 |
|  | rs2868371 | 20/46/67 | 26/51/105 |  |  |  |  |  |  |
|  | rs7459185 | 43/69/20 | 64/84/33 | 1.00(0.72-1.38) | 0.977 | 1.15(0.71-1.87) | 0.571 | 0.78(0.42-1.46) | 0.442 |
| *HSPE1* | rs13386066 | 80/48/5 | 121/50/9 | 1.21(0.82-1.80) | 0.343 | 1.37(0.85-2.20) | 0.194 | 0.80(0.26-2.50) | 0.704 |
|  | rs17730989 | 8/48/75 | 15/74/91 | 0.86(0.59-1.24) | 0.414 | 0.84(0.53-1.34) | 0.460 | 0.78(0.31-1.92) | 0.582 |
|  | rs2605039 | 31/60/42 | 40/94/47 | 0.99(0.72-1.37) | 0.966 | 0.86(0.52-1.43) | 0.566 | 1.16(0.67-2.01) | 0.587 |
| continued | | | | | | | | | |
| Gene | Polymorphisms | Severe toxicity  (11/12/22) | Non-severe toxicity  (11/12/22) | Additive |  | Dominant |  | Recessive |  |
|  |  |  |  | OR(95%CI) | P value | OR(95%CI) | P value | OR(95%CI) | P value |
| *RAC1* | rs10951983 | 115/17/1 | 159/22/1 | 1.10(0.59-2.06) | 0.774 | 1.10(0.56-2.17) | 0.777 | 1.17(0.07-20.18) | 0.913 |
|  | rs3813517 | 107/24/2 | 137/36/8 | 0.71(0.44-1.13) | 0.145 | 0.76(0.43-1.32) | 0.325 | 0.24(0.05-1.18) | 0.079 |
|  | rs836548 | 83/44/6 | 100/67/13 | 0.78(0.54-1.15) | 0.212 | 0.79(0.49-1.26) | 0.319 | 0.56(0.20-1.55) | 0.262 |
|  | rs836556 | 110/23/0 | 151/29/2 | 1.02(0.58-1.81) | 0.943 | 1.10(0.60-2.01) | 0.766 |  |  |
| *RhoA* | rs3811699 | 117/14/3 | 153/29/1 | 0.93(0.53-1.66) | 0.814 | 0.77(0.40-1.49) | 0.439 | 5.53(0.57-54.05) | 0.142 |
|  | rs9878943 | 117/10/3 | 155/23/0 | 1.02(0.54-1.94) | 0.953 | 0.79(0.38-1.64) | 0.521 |  |  |

11/12/22: Wild-type/heterozygote/homozygote
